# Supplementary material for: DNA topoisomerase II inhibition potentiates osimertinib’s therapeutic efficacy in EGFR-mutant non–small cell lung cancer models
Source: JCI journal article supplement (doi:10.1172/jci172716), 2024-03-07
Supplement: sd2 [file 2]

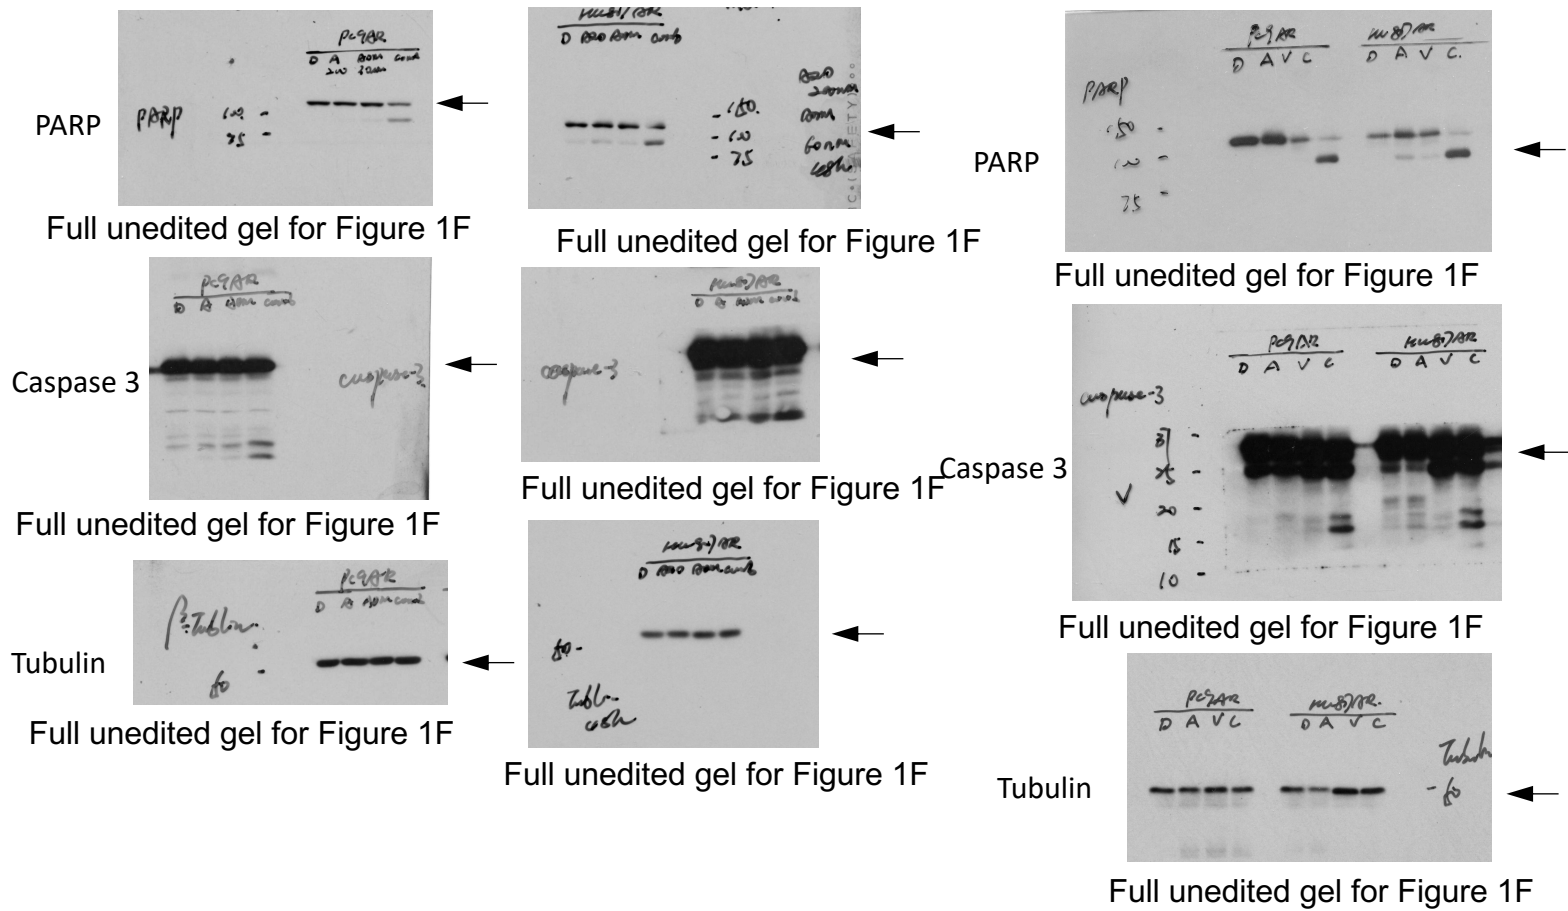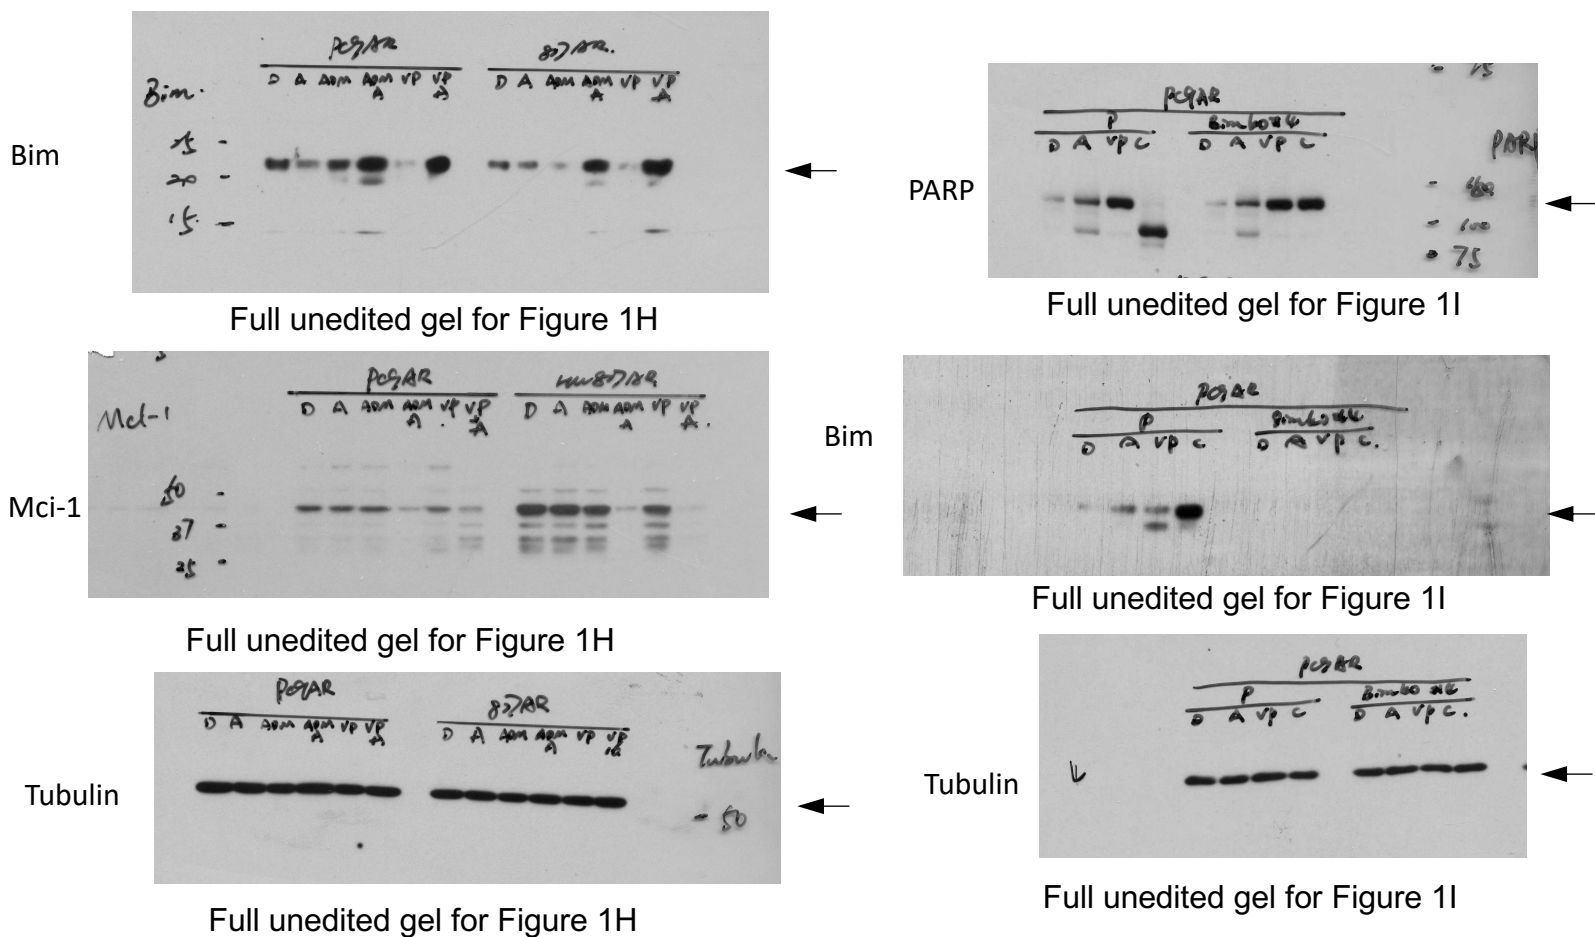

Fig 1

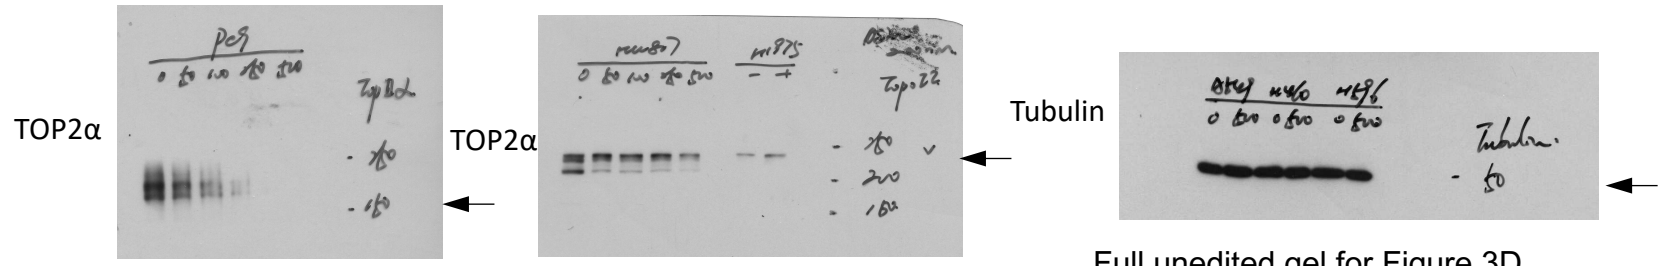

Full unedited gel for Figure 3A

Full unedited gel for Figure 3A

Full unedited gel for Figure 3D

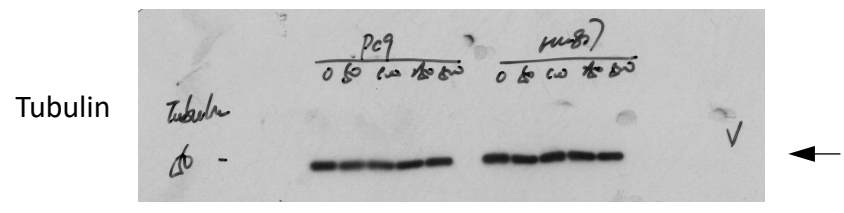

Full unedited gel for Figure 3A

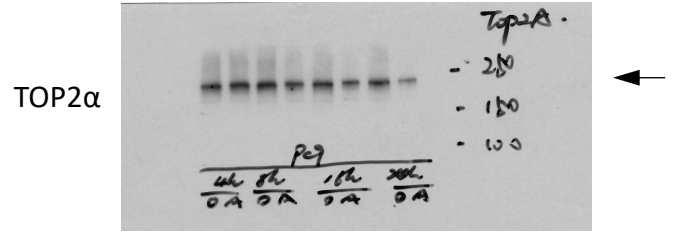

Full unedited gel for Figure 3B

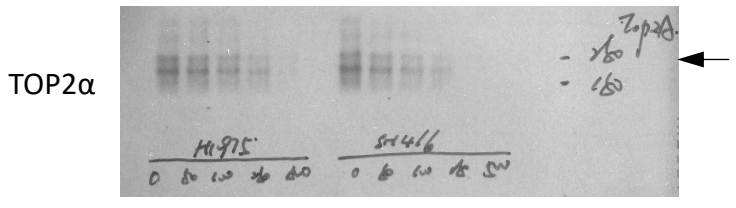

Full unedited gel for Figure 3A

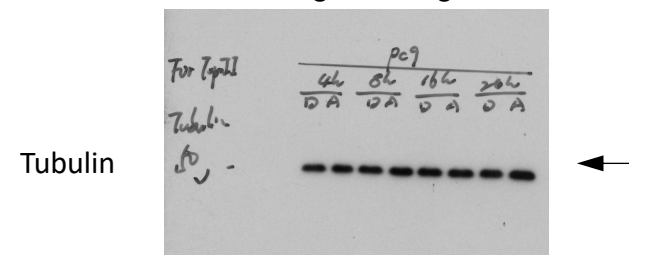

Full unedited gel for Figure 3B

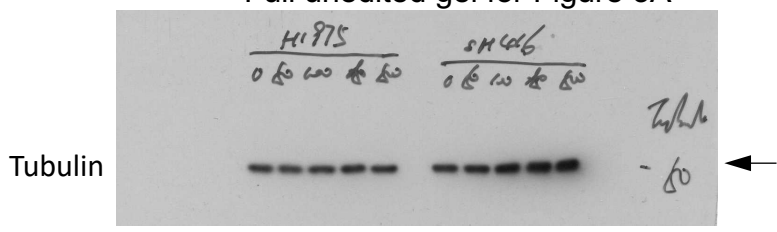

Full unedited gel for Figure 3A

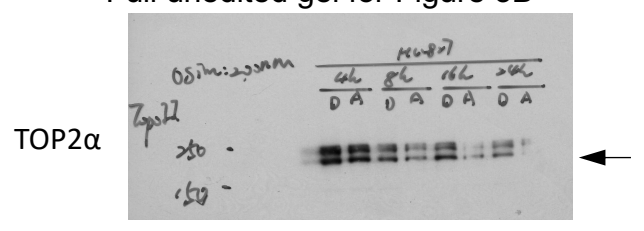

Full unedited gel for Figure 3B

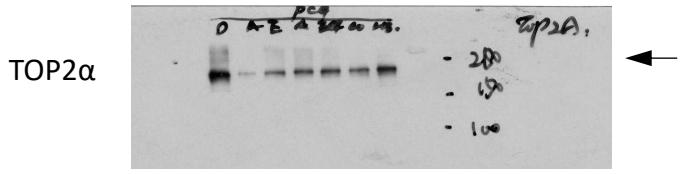

Full unedited gel for Figure 3C

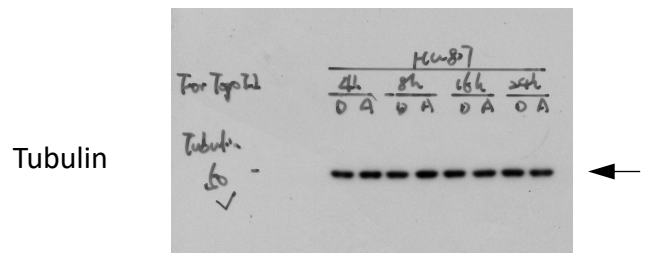

Full unedited gel for Figure 3B

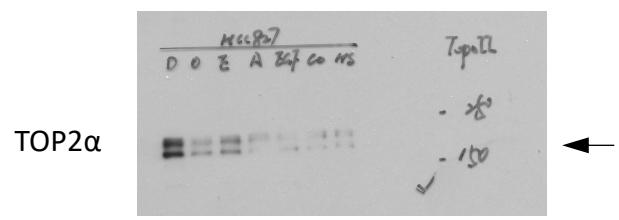

Full unedited gel for Figure 3C

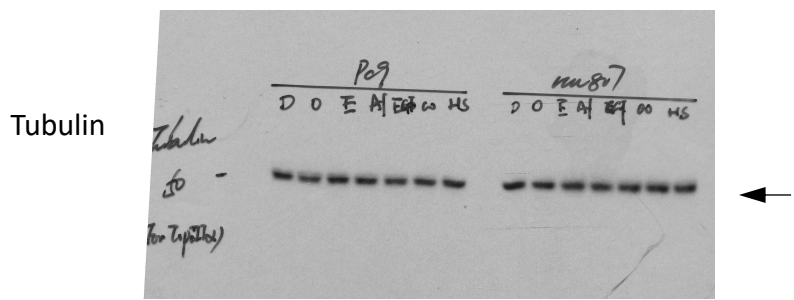

Full unedited gel for Figure 3C

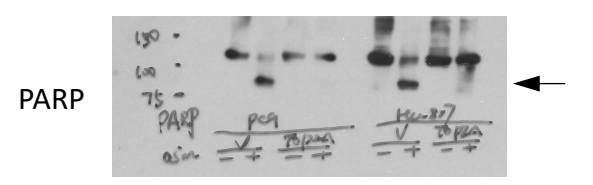

Full unedited gel for Figure 3G

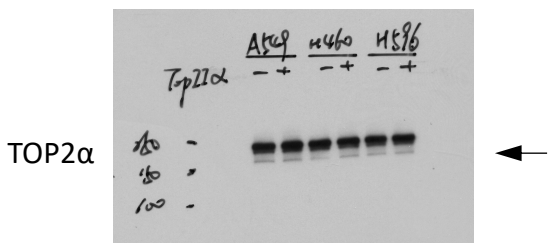

Full unedited gel for Figure 3D

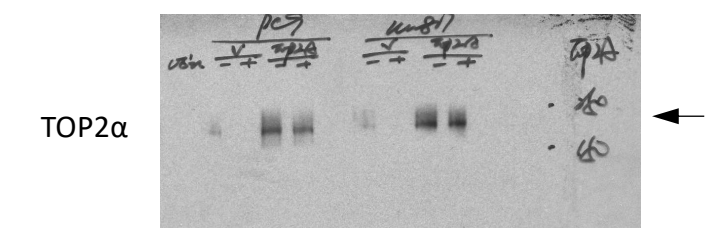

Full unedited gel for Figure 3G

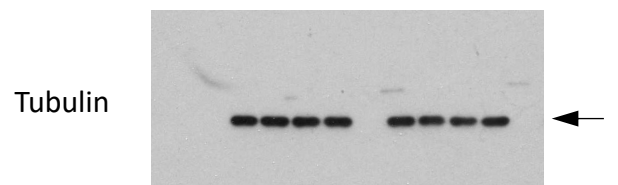

Full unedited gel for Figure 3G

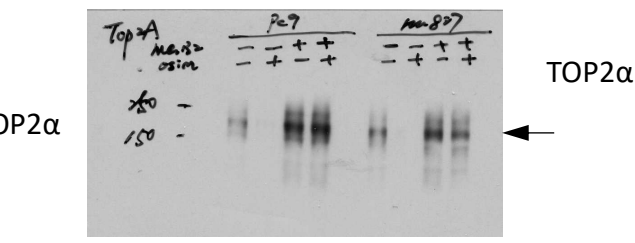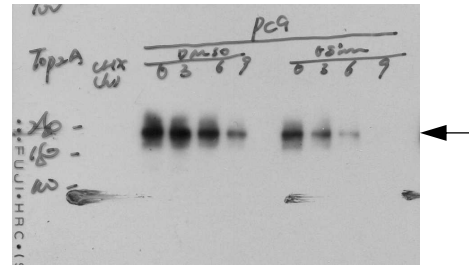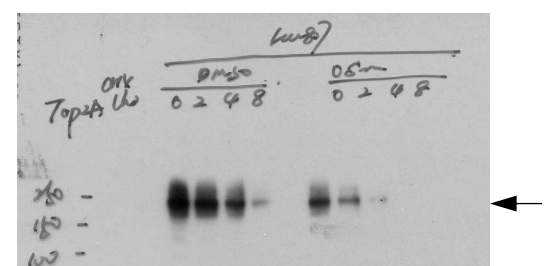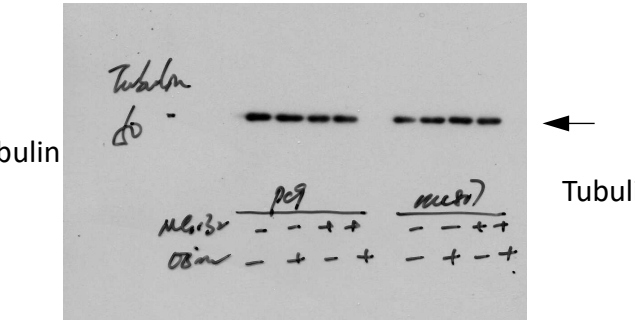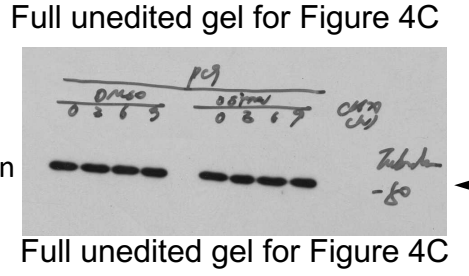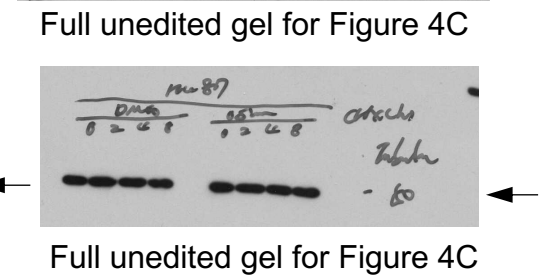

Full unedited gel for Figure 4B

Full unedited gel for Figure 4C

Full unedited gel for Figure 4C

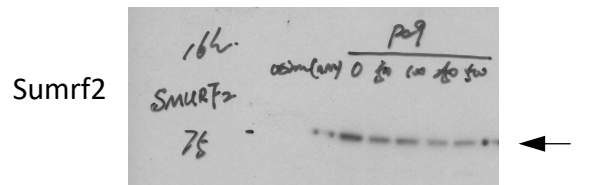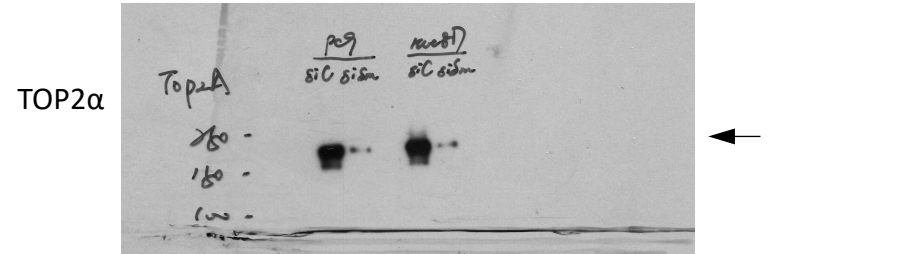

Full unedited gel for Figure 4E

Full unedited gel for Figure 4F

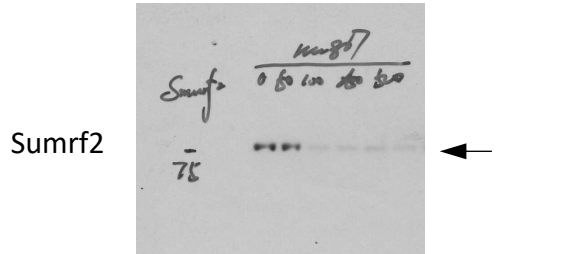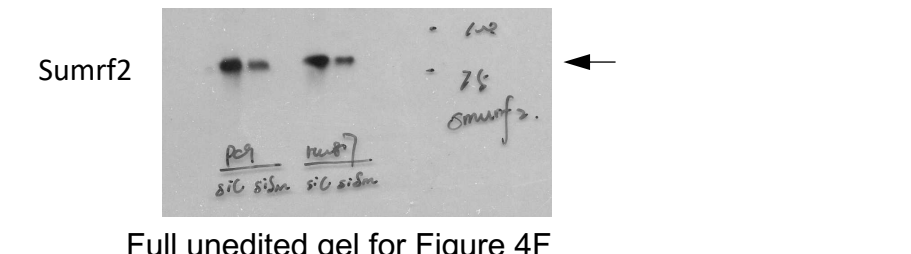

Full unedited gel for Figure 4E

Full unedited gel for Figure 4F

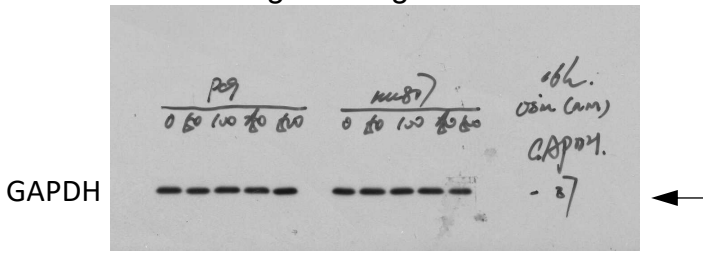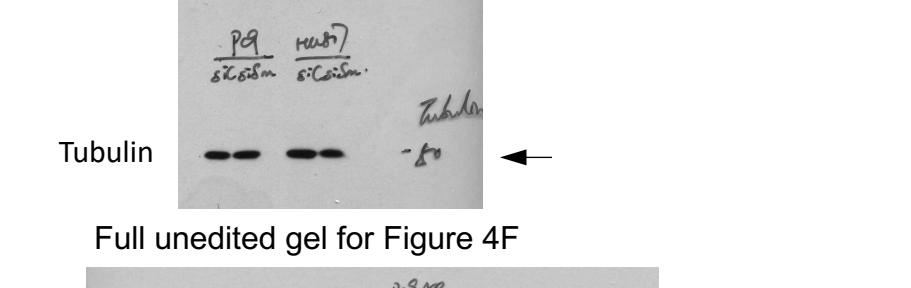

Full unedited gel for Figure 4E

Full unedited gel for Figure 4F

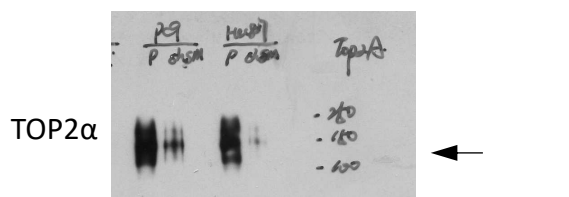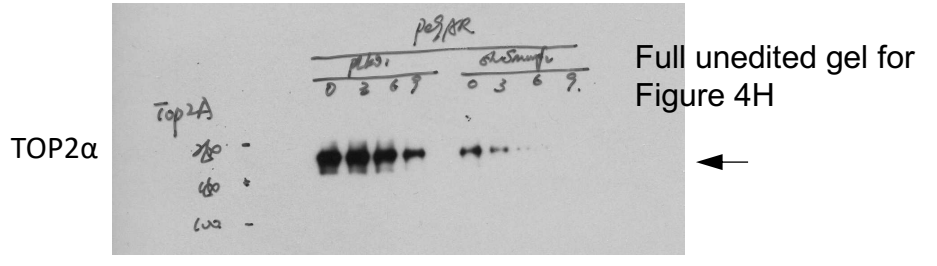

Full unedited gel for Figure 4G

Full unedited gel for Figure 4H

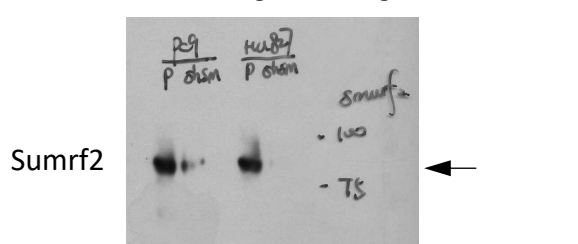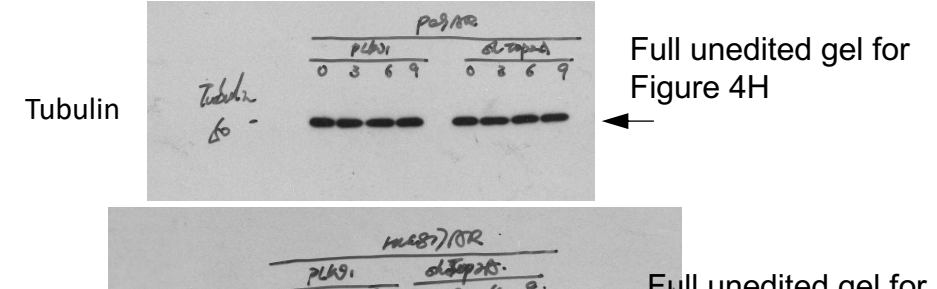

Full unedited gel for Figure 4G

Full unedited gel for Figure 4H

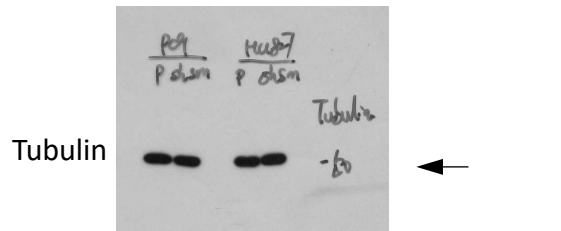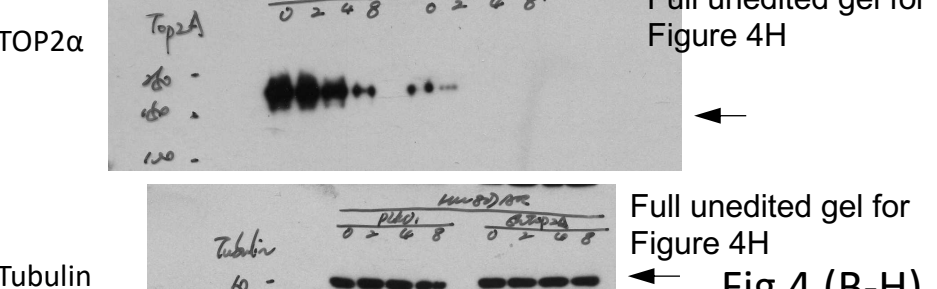

Full unedited gel for Figure 4G

Full unedited gel for Figure 4H

Full unedited gel for Figure 4H

Fig 4 (B-H)

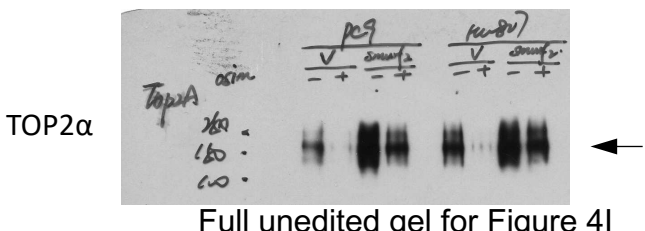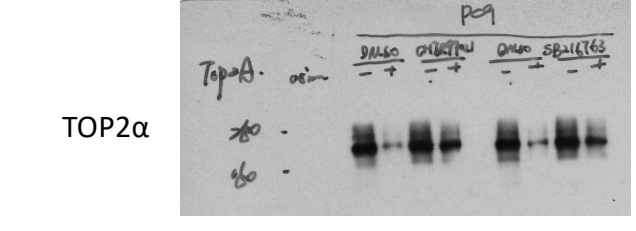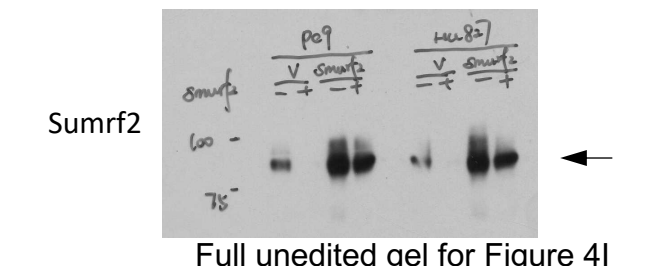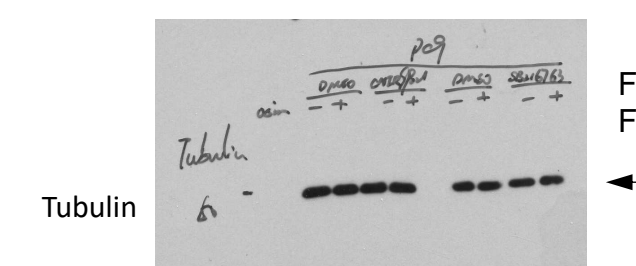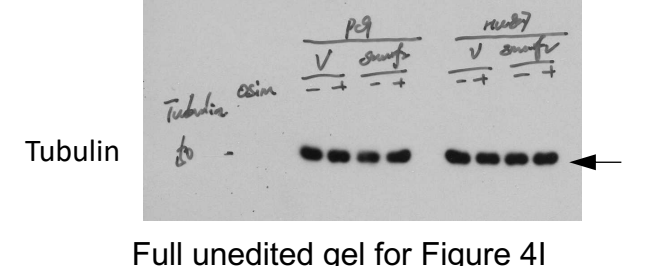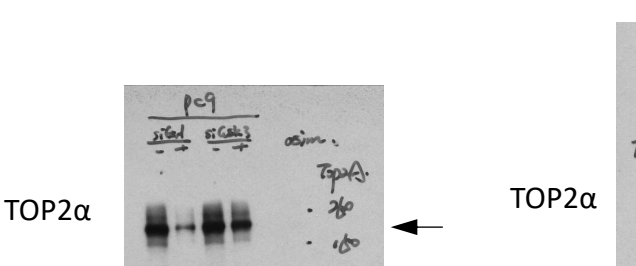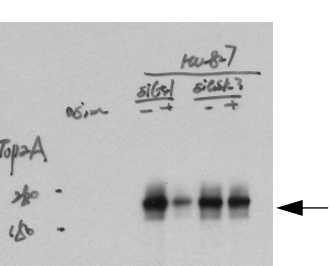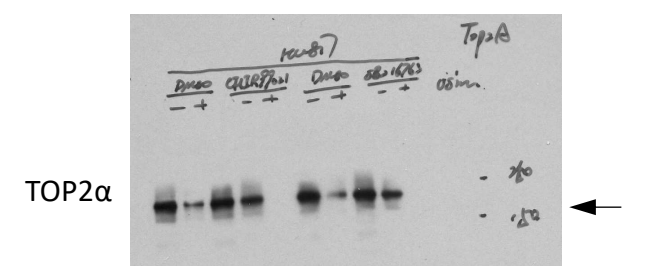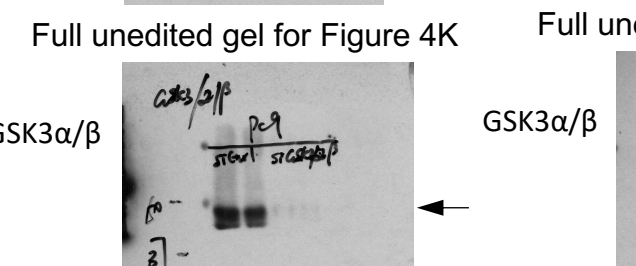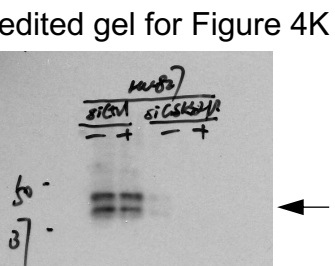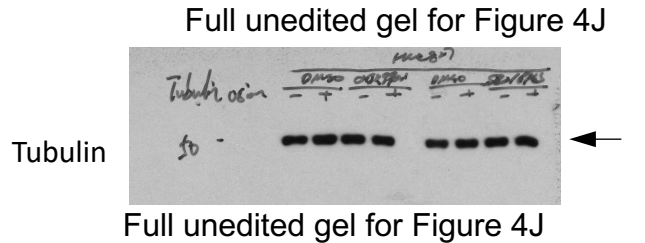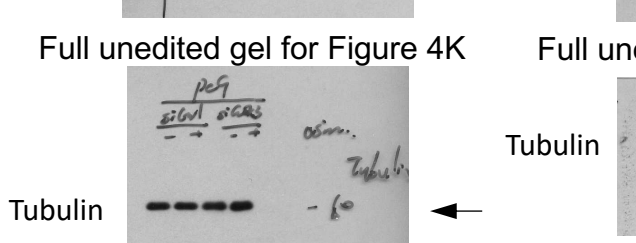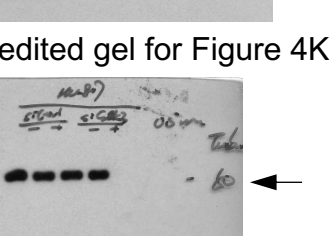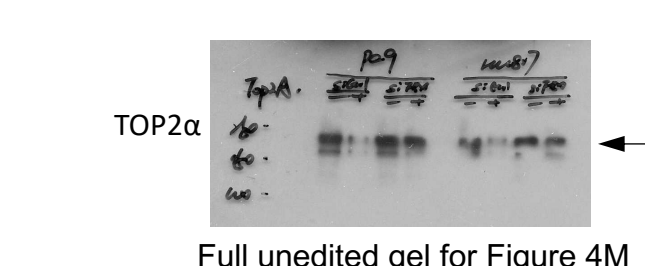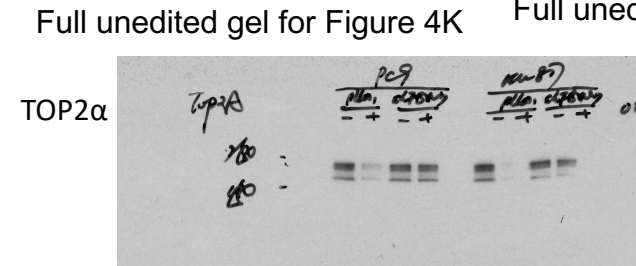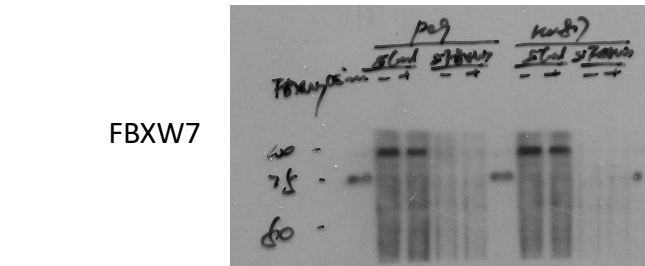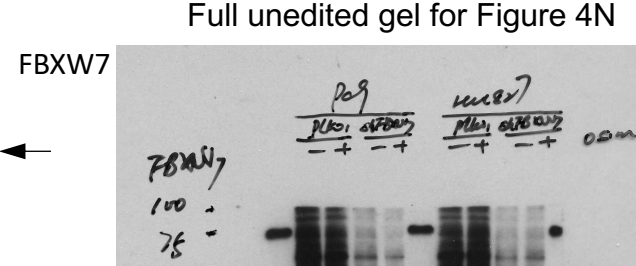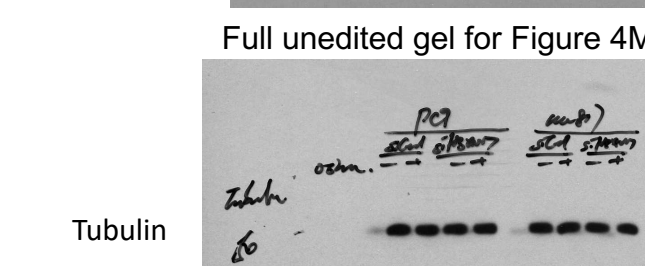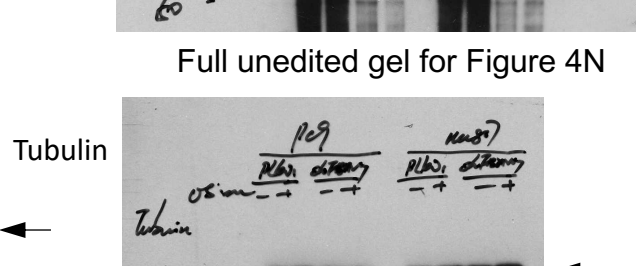

Fig 4 (I-N)



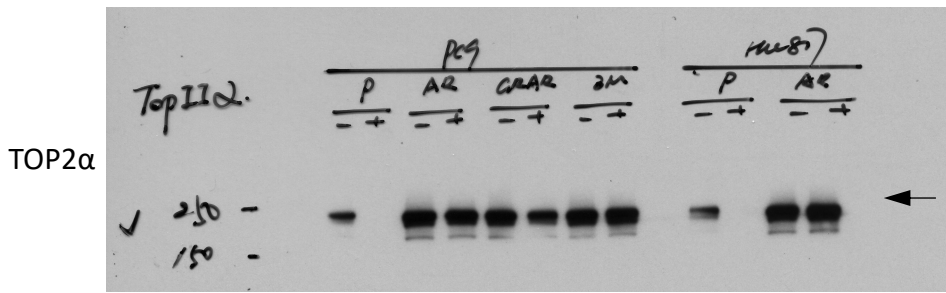

Full unedited gel for Figure 5A

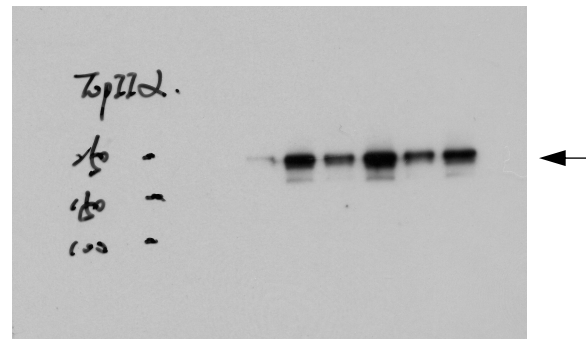

Full unedited gel for Figure 5B

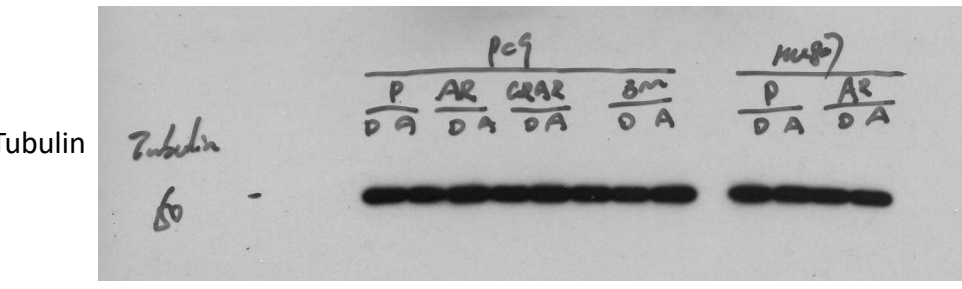

Full unedited gel for Figure 5A

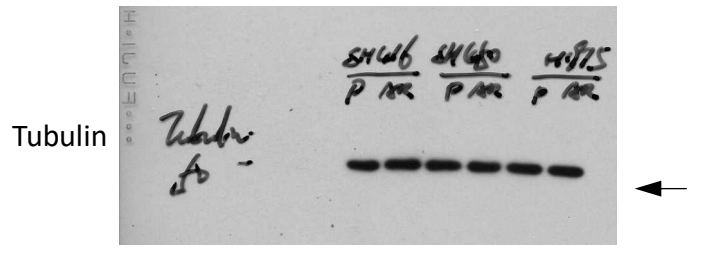

Full unedited gel for Figure 5B

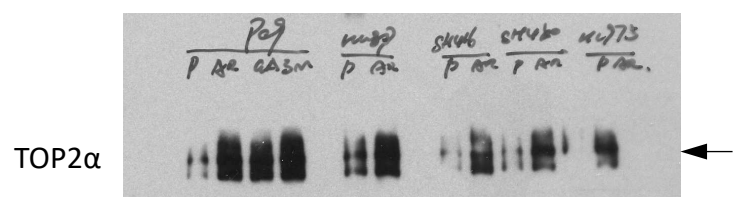

Full unedited gel for Figure 5F

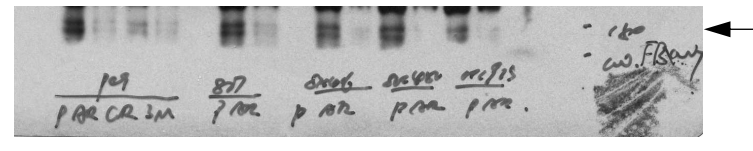

Full unedited gel for Figure 5F

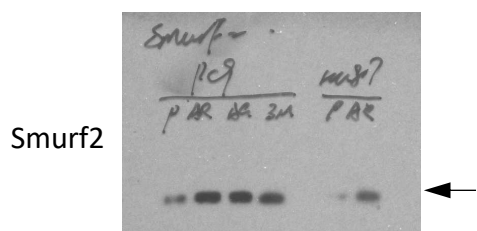

Full unedited gel for Figure 5F

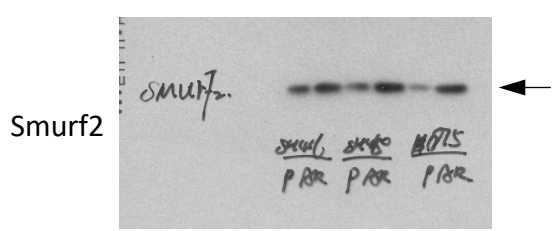

Full unedited gel for Figure 5F

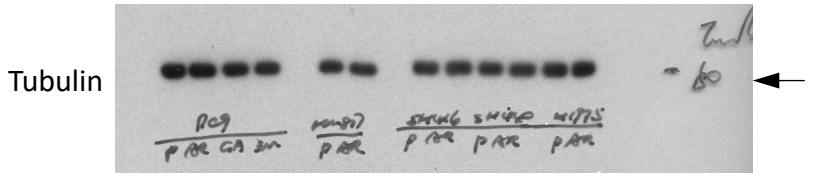

Full unedited gel for Figure 5F

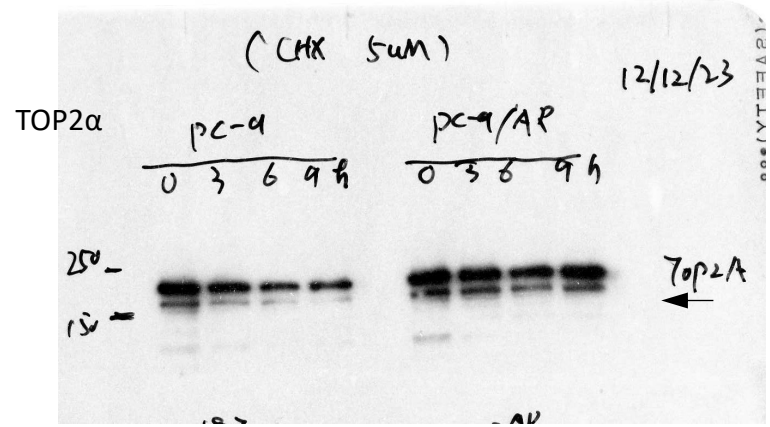

Full unedited gel for Figure 5H

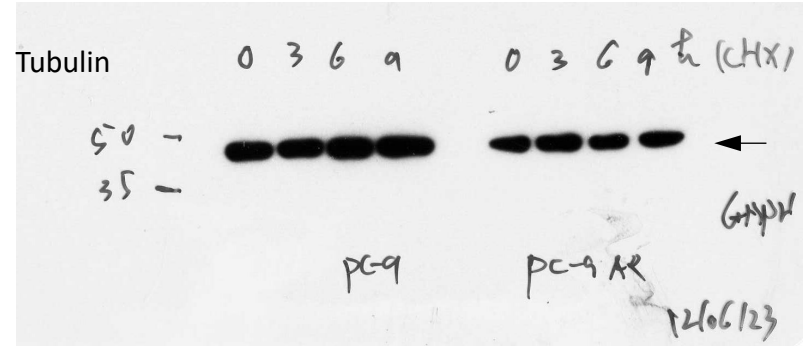

Full unedited gel for Figure 5H

PARP

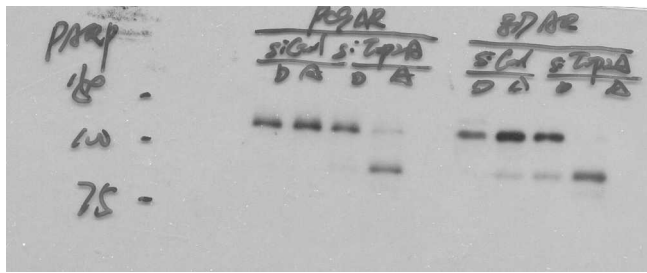

Full unedited gel for Figure 6A

TOP2α

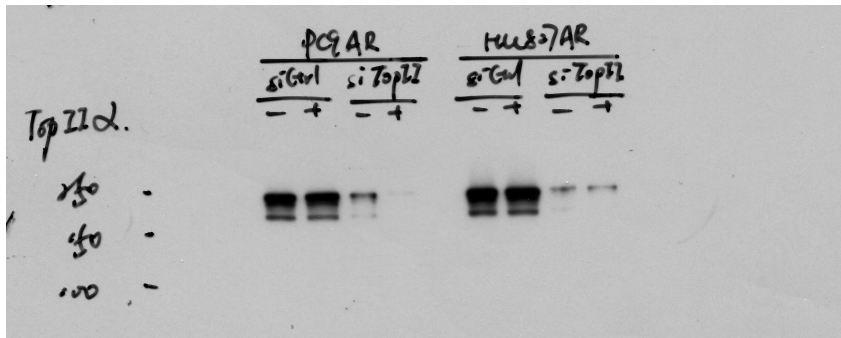

Full unedited gel for Figure 6A

Tubulin

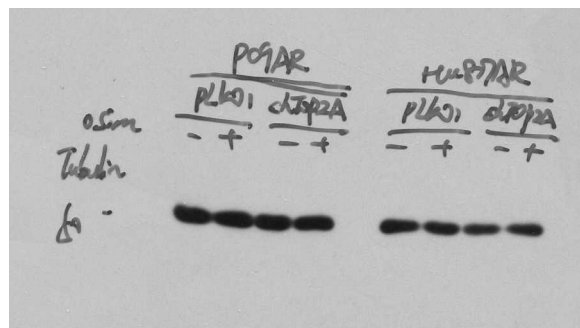

Full unedited gel for Figure 6A

PARP

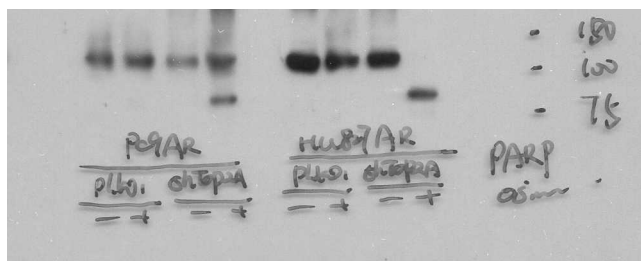

Full unedited gel for Figure 6B

TOP2α

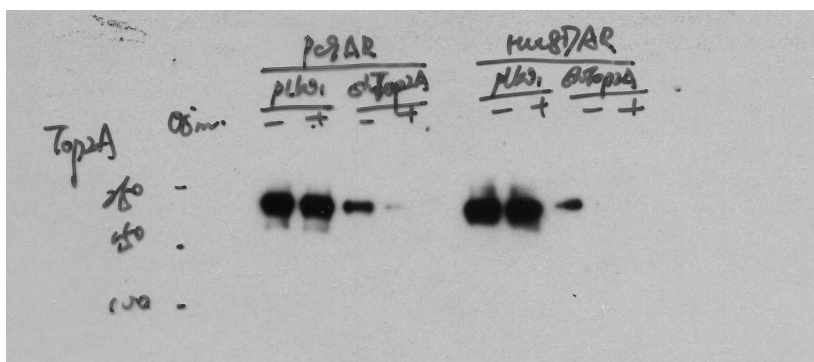

Full unedited gel for Figure 6B

Tubulin

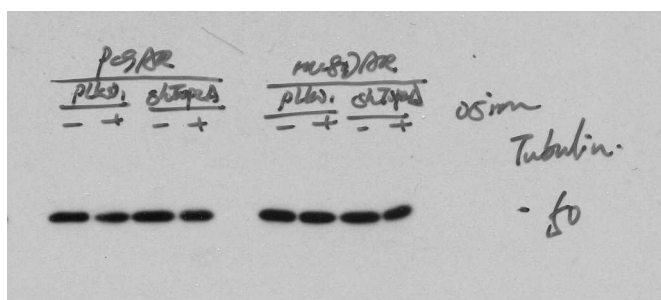

Full unedited gel for Figure 6B

Fig 6

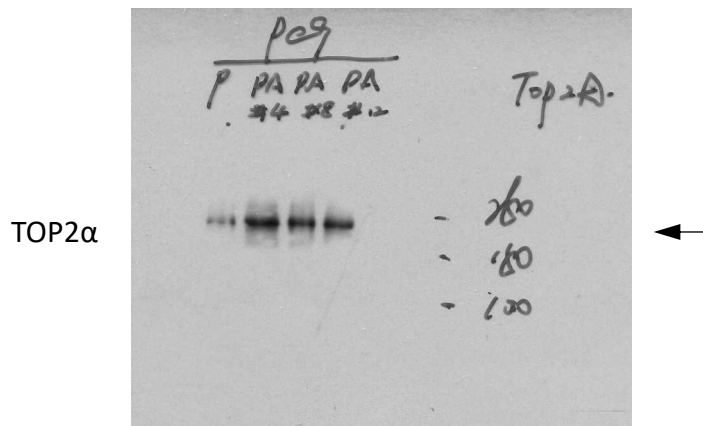

Full unedited gel for Figure 7A

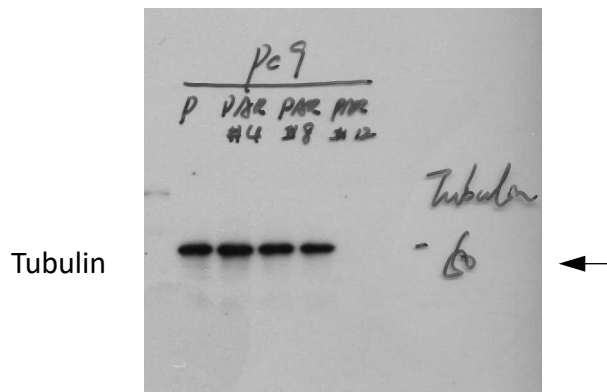

Full unedited gel for Figure 7A

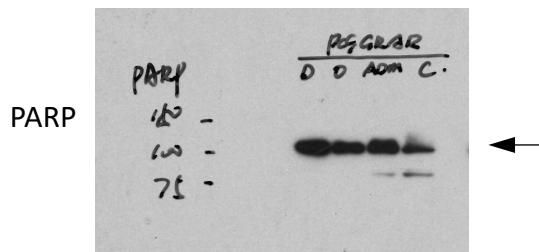

Full unedited gel for Figure S2D

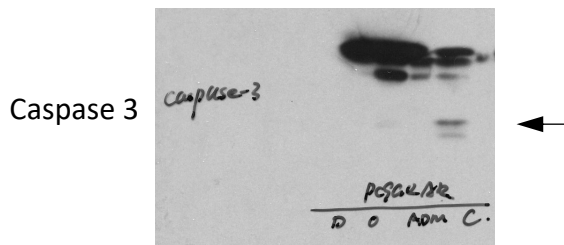

Full unedited gel for Figure S2D

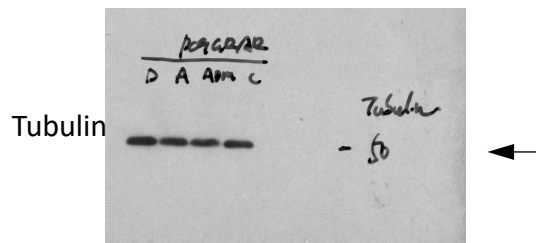

Full unedited gel for Figure S2D



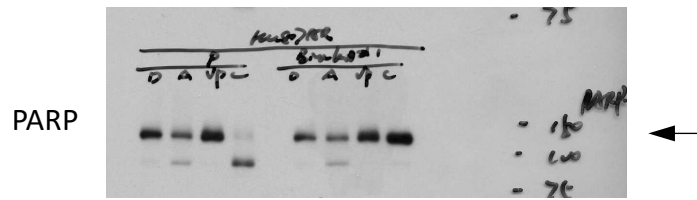

Full unedited gel for Figure S3A

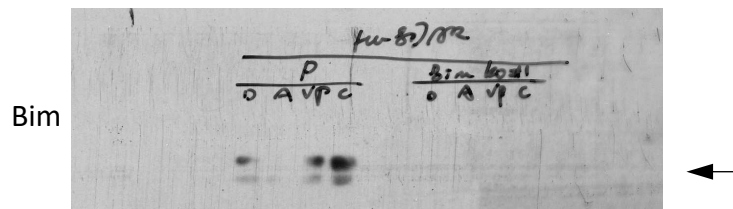

Full unedited gel for Figure S3A

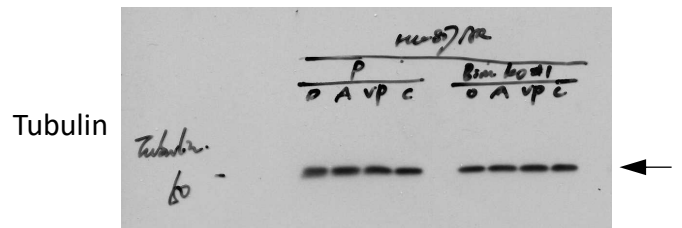

Full unedited gel for Figure S3A

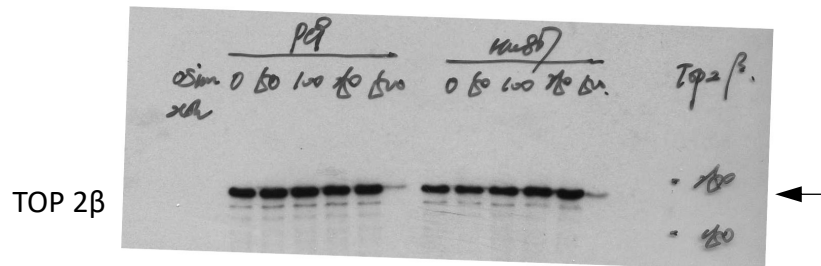

Full unedited gel for Figure S8

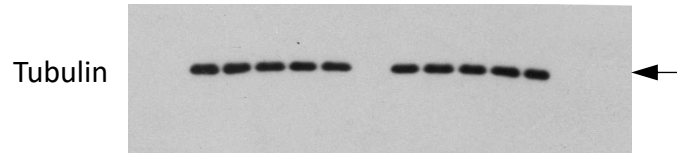

Full unedited gel for Figure S8

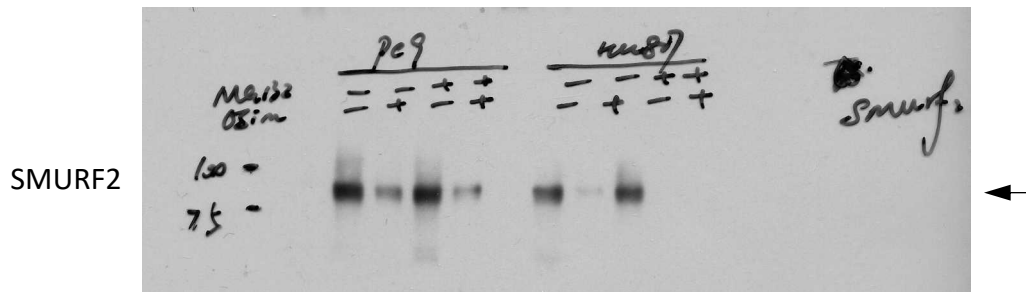

Full unedited gel for Figure S9

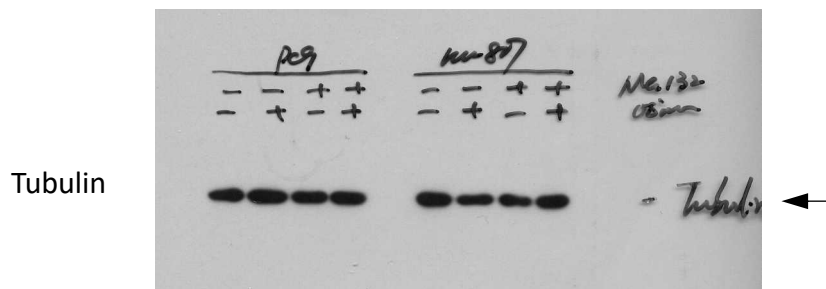

Full unedited gel for Figure S9
